# Supplementary material
Source: PubMed Central journal article supplement (PMC4282507)
Supplement: embj0033-2201-sd1.pdf [file embj0033-2201-sd1.pdf]

## Supplementary Figure Legends

### Supplementary Figure S1: The promoters of the Pumilio complex are bound and regulated by the dREAM complex in *Drosophila*

(A) Relative RT-PCR levels from IgG, RBF1, E2F1 and E2F2 ChIP from *Drosophila* larvae of the *actin*, *brat*, *pumilio* (*pum*) and *nanos* (*nos*) gene transcription start sites (TSS) and genomic region (gene). (B) Relative probe intensities from ChIP-chip assays of dREAM (E2F2, Myb, Mip120, Mip130 and Lin-52) components on the promoter of the Pum complex members (Georlette et al, 2007). (C) Relative RT-PCR levels of *e2f1*, *dp1*, *e2f2* and *rbf1* from adult females expressing Arm-Gal4, UAS-RNAi constructs. (D) RT-PCR of *e2f2*, *pumilio*, *nanos* (*nos*) and *brat* from E2F2 heterozygote mutants (*e2f2/T2Δ3*) and E2F2 homozygote mutant (*e2f2/e2f2*) females.

### Supplementary Figure S2: dREAM components regulate Pumilio complex expression

(A) Relative RT-PCR levels of tubulin (*tub*), *pumilio* (*pum*), *brat* and *nanos* (*nos*) from *Drosophila* S2 cells transfected with dsRNA targeting Luciferase (*Luc*), E2F1 and E2F2. (B) Relative expression levels of *tub*, *e2f1* and *e2f2* following dsRNA treatment of S2 cells. (C) Relative expression of *pum*, *nos* and *brat* from Kc cells following depletion of dREAM components, Mip120, Mip130, Myb, E2F2, Rbf1/2, Lin32, Mip40 and *l(3)mbt* (Georlette et al, 2007). (D) Relative Luciferase levels from reporter constructs containing the *pumilio*, *nanos* and *brat* promoters upstream of the Luciferase gene from S2 cells depleted of GFP, E2F1, E2F2 or RBF1.

### Supplementary Figure S3: The human pocket proteins regulate the expression of the mammalian PUM complex

(A) RT-PCR results for PUM components (PUM1, PUM2, NANOS1, NANOS2 and NANOS3), E2F target (*Cyc A*) and non-E2F target (*E2F3*) from BJ fibroblast cells transfected with siRNA pools targeting the pocket proteins (*Rb1*, *p107* and *p130*) individually and in combination. (B) Western blots of NANOS1 (NOS1), PUMILIO1 (PUM1), PUM2, *Rb1*, *p107*, *p130* and Tubulin (TUB) from BJ cells transfected with siRNAs targeting the pocket proteins. (C) Western blots of NOS1, PUM1, PUM2, *Rb1*, *p107*, *p130* and Tubulin (TUB) from RPE cells transfected with siRNAs targeting the pocket proteins.

### Supplementary Figure S4: Rb1 loss diminishes pocket protein binding to the NANOS1 promoter

(A) Relative RT-PCR levels of *CDC6* (E2F target gene), the NANOS1 promoter (NOS1 Prom) and -1000bp upstream of the NANOS1 TSS in IgG (-ve control), E2F4, *p130* and *p107* ChIP's from BJ cells depleted for scrambled control sequences (Scr) or RB using siRNA. (B) Relative RT-PCR levels of *CDC6*, the NANOS1 transcription start site (TSS), -1000bp upstream of the NANOS1 TSS and the NANOS1 3'UTR in IgG (-ve control), E2F4, *p130* and *p107* ChIP's from Y79 Retinoblastoma cells.

### Supplementary Figure S5: p16 and CDK inhibitors effect NANOS expression

**(A)** Relative RT-PCR results of p16, NANOS1-3 and PUM1-2 from BJ cells depleted of p16 using shRNA. **(B)** Drug sensitivity assay of HCT116 cells treated with the CDK4/6 inhibitor PD0332991 (PD) or DMSO for 4 days. **(C)** Relative RT-PCR results of NANOS1-3 and PUM1-2 from HCT116 cells treated with DMSO or PD0332991 (PD) at 1 $\mu$ M or 100nM concentrations.

**Supplementary Figure S6: NANOS1 expression is antiF correlated with Rb1 levels**

**(A)** Correlation and p-value of PUM1, PUM2, NANOS1, NANOS2 and NANOS3 expression with Rb1 levels from a broad panel of cancer cell lines (Barretina et al, 2012). **(B)** Correlation and p-value of PUM1, PUM2, NANOS1, NANOS2 and NANOS3 with Rb1, Rbl1 (p107) and Rbl2 (p130) expression from cancer cell line expression database. **(C)** Correlation and p-value of PUM1, PUM2, NANOS1, NANOS2 and NANOS3 with the Rb1 loss signature (Herschkowitz et al, 2008). **(D)** NANOS1 expression levels in NSCLC cells in cells retaining Rb1 and p53 activity, compared to cells lacking p53 and Rb1 respectively. **(E)** NSCLC cell lines used for analysis in Supp Fig 4D. **(F)** Relative NANOS1 expression levels from the Sanger cancer cell line encyclopedia in cancer cells expressing low, average and high levels of Rb1.

**Supplementary Figure S7: Heat map of the correlation between PUM/ NANOS with the Rb1 loss signature**

**(A)** Heat map of the correlation between PUM1, PUM2, NANOS1, NANOS2 and NANOS3 and each gene in the Rb1 loss signature (Herschkowitz et al, 2008).

**Supplementary Figure S8: Genetic interaction between Pum components and RBF1 and E2F2**

**(A)** Images of wing phenotypes from crosses of Nub-Gal4 or Nub-Gal4; Rbf1-RNAi females were mated with males carrying UAS-RNAi constructs targeting the PUM complex (PUM, Nos and Brat RNAi) or mutants with deficiencies in the brat locus (*Brat<sup>ts1</sup>* and *Brat<sup>1</sup>*). **(B)** Images of wing phenotypes from En-Gal4; E2F2 RNAi females crossed to UAS-RNAi constructs targeting Gal4, Pum, Nos and Brat. **(C)** Images of wings from UAS-Dicer; Nub-Gal4 and UAS-Dicer; Nub-Gal4; Gal4 RNAi crosses to individual RNAi constructs targeting, Pum, Nos, Brat, Luc and Gal4.

**Supplementary Figure S9: Rb1 and Nanos1 depletion reduces murine cell number**

**(A)** Relative RT-PCR of Rb1, p107 and p130 from wild-type (wt), Rb1 mutant (Rb1-/-), p107 mutant (p107-/-), p130 mutant (p130-/-) and Rb1, p107 and p130 mutant (triple) 3T3s. **(B)** Western blots of Nanos1, Pum2 and TUB from wild type 3T3 cells depleted with shRNAs targeting Nanos1 (N1-3 and N1-4), Pum2 (P2-1 and P2-5) and scrambled controls (Scr). **(C)** Crystal violet staining of wild-type (duplicate of Figure 3A) and triple-mutant 3T3s (Rb, p107 and p130 -/-) with shRNAs targeting Nanos1 (mNos1-3 and mNos1-4) or a scrambled control sequence (Scr). **(D)** Relative RT-PCR of Nanos1, Pum1 and Pum2 mouse 3T3 cells infected with shRNAs targeting Nanos1, Pum1, Pum2 and Scrambled

(Scr) sequences. **(E)** Quantification of wild-type, Rb1 null (Rb -/-), p107 null (p107-/-), p130 null (p130-/-) and triple negative (Rb1, p107 and p130 -/-, triple -/-) mouse 3T3 cells infected with shRNA targeting Nanos1, Pum1 and Pum2.

### **Supplementary Figure S10: Depletion of NANOS1 and pRb reduces human cell number**

**(A)** Relative RT-PCR levels of Nanos1-3, Pum1-2, Cyclin A (Cyc A) (E2F target gene) and E2F3 (non-E2F target) in wild type, *Rb1* -/-, *p107* -/-, *p130* -/- and triple-mutant (*Rb1*, *p107* and *p130* -/-) 3T3 cells. **(B)** Relative RT-PCR levels of p16 in wild type (wt), *Rb1* null (Rb-/-), *p107* null (p107-/-) and *p130* null (p130-/-) 3T3 cells. **(C)** Western blots of Tubulin (TUB), pRb and NANOS1 (NOS1) from BJ cells infected with shRNAs targeting pRb (E3, D4 and D5), NANOS1 (N1-1 and N1-3) and scrambled (Scr sequences). **(D)** Crystal violet staining of Calu-1 cells infected with shRNAs targeting Rb1 (Rb1 E3 and Rb1 D4), NANOS1 (hNOS1-1 and hNOS1-3) and scrambled (Scr) sequences.

### **Supplementary Figure S11: Functional p53 is necessary for Rb1 and NANOS1 silencing to affect cell number in cancer cell lines**

**(A)** Quantification of cell staining in cancer cell lines after depletion of NANOS1 (NOS1-3 and NOS1-4) and control scrambled sequences (Scr). P-value: \*p<0.05, \*\*p<0.01. **(B)** Extended table and crystal violet staining of cancer cell lines tested for synthetic lethality phenotype. The table details each cell lines Rb1/p16 and TP53 status and whether a synthetic lethality phenotype was observed upon NANOS1 depletion. Cell lines are boxed according to tissue: white =non-transformed controls, yellow box =NSCLC cells, blue=bladder, pink=breast, orange=head and neck, red=293T, grey=colorectal, olive=bone. **(C)** Quantification of cell staining of isogenic HCT116 cells retaining or lacking p53 activity after depletion of NANOS1 or scrambled control. P-value: \*p<0.05.

### **Supplementary Figure S12: NANOS1 depletion reduces cell number in pRbF deficient cancer cells**

**(A)** Growth curve of Y79 Retinoblastoma cells depleted of NANOS1 or scrambled control (Scr) using siRNA. **(B)** Growth curve of NCI-H1666 cells depleted of NANOS1 or scrambled control (Scr) using siRNA. **(C)** Relative RT-PCR levels of NANOS1 from Y79 and NCI-H1666 cells treated with a pool of siRNAs targeting NANOS1.

### **Supplementary Figure S13: Loss of PUM activity stabilizes transcripts downF regulated in Retinoblastoma tumors.**

**(A)** Time course of RNA stability for the MAP3K1 transcript in Y79 Retinoblastoma cells treated with Actinomycin D depleted of PUM1, PUM2 or scrambled control sequence. **(B)** Time course of RNA stability for the MAP2K3 transcript in Y79 Retinoblastoma cells treated with Actinomycin D depleted of PUM1, PUM2 or scrambled control sequence. **(C)** Time course of RNA stability for the E2F4 transcript (non-PRE containing mRNA) in Y79 Retinoblastoma cells treated with Actinomycin D depleted of PUM1, PUM2 or scrambled control

sequence. **(D)** Western blot of Y79 cells treated with shRNAs targeting PUM1 (P1-15 and P1-19) and PUM2 (P2-1 and P2-4).

**Supplementary Figure S14: NANOS1 mediated regulation of MAP kinase activity is postF transcriptional.**

**(A)** Western blots from HCT-116 p53<sup>-/-</sup> cells of PUM1, PUM2, TUB used for Map2K3 Luciferase experiments. **(B)** Western blots of MAP3K1, MAP2K3, NANOS1 and TUB from HCT116 cells depleted with shRNAs targeting NANOS1 (1-1 and 1-3) or scrambled controls (Scr). **(C)** Relative RT-PCR levels of NANOS1, MAP3K1 and MAP2K3 from HCT116 cells depleted with shRNAs targeting NANOS1 (1-1 and 1-3) or scrambled controls (Scr). **(D)** Western blot of MAP3K1 and TUB from HCT116 cells depleted with shRNAs targeting MAP3K1 (1 and 2) and scrambled controls (Scr). **(E)** Quantification of HCT116 cell number upon NANOS1 and MAP3K1 depletion by shRNA.

**Supplementary Table S1: Genetic interaction between PUM complex members and rbf1 and e2f2**

**Miles\_Supplementary Figure S1: The promoters of the Pumilio complex are bound and regulated by the dREAM complex in *Drosophila***

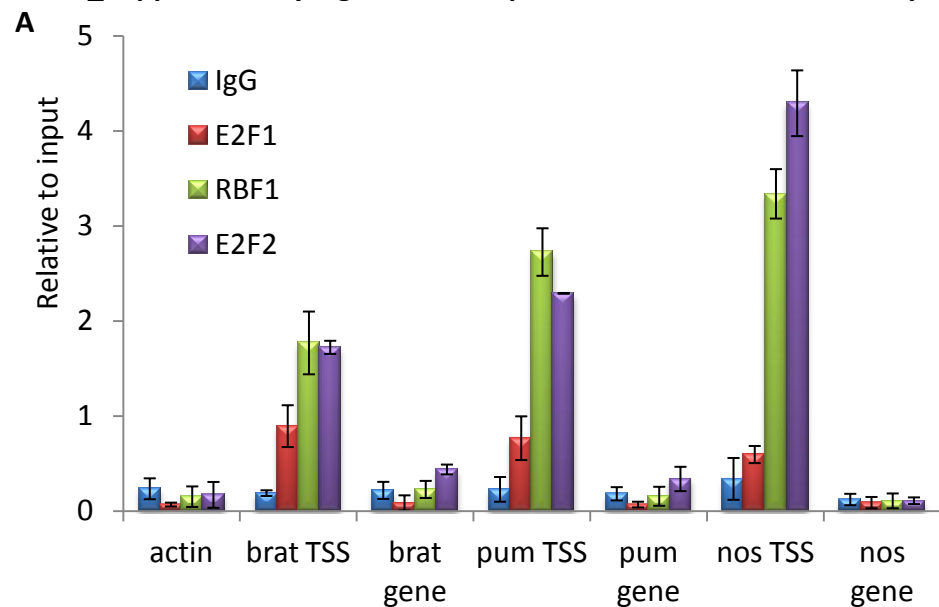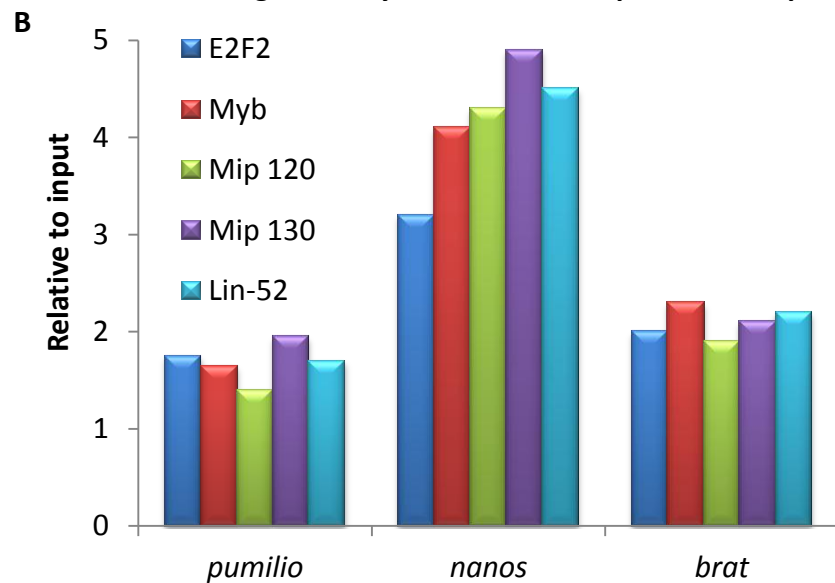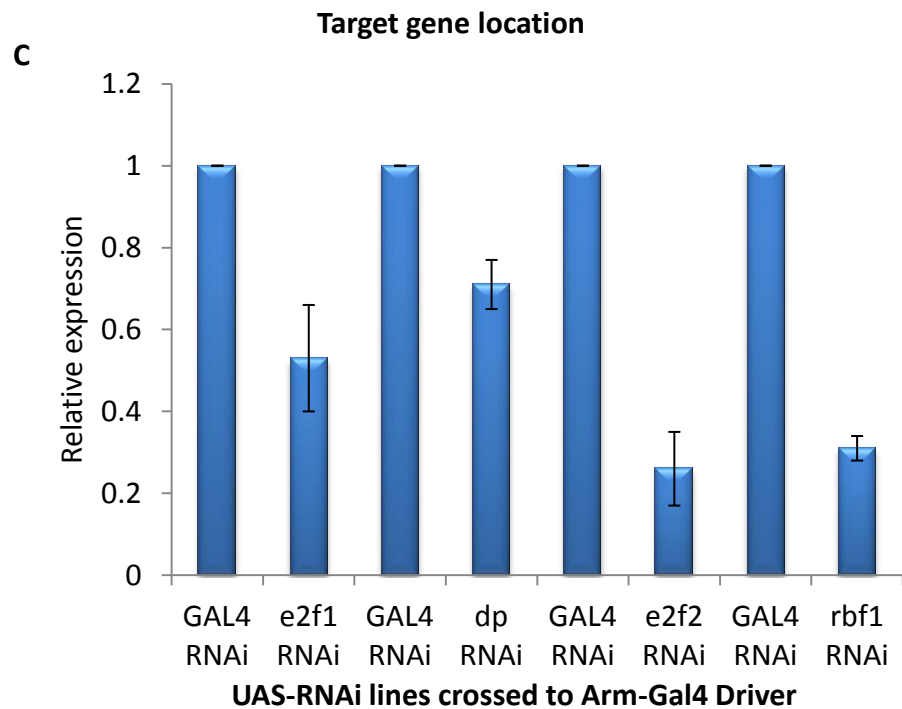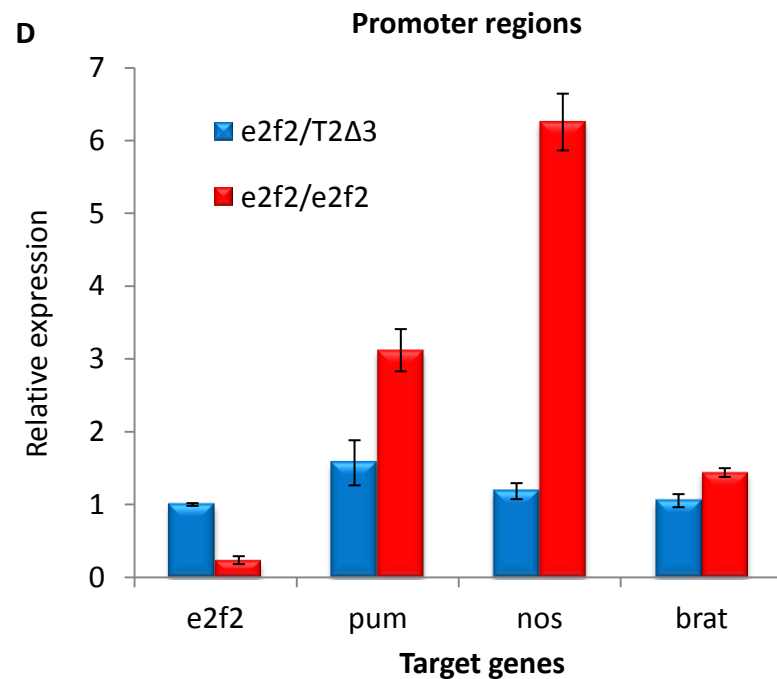

Miles\_Supplementary Figure S2: dREAM components regulate Pumilio complex expression

**A**

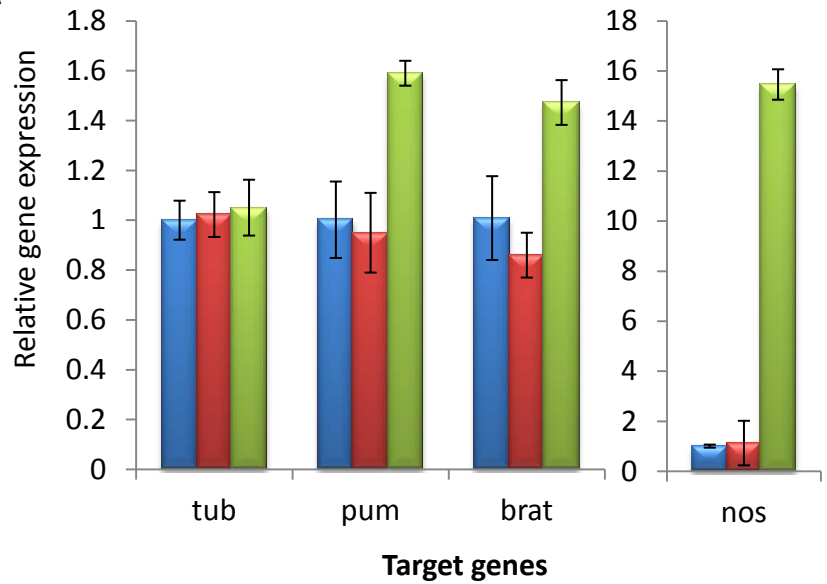

**B**

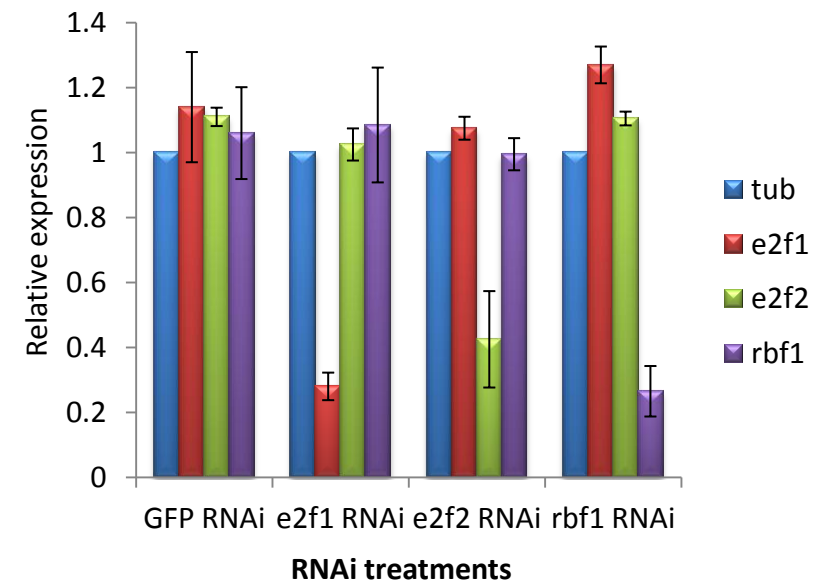

**C**

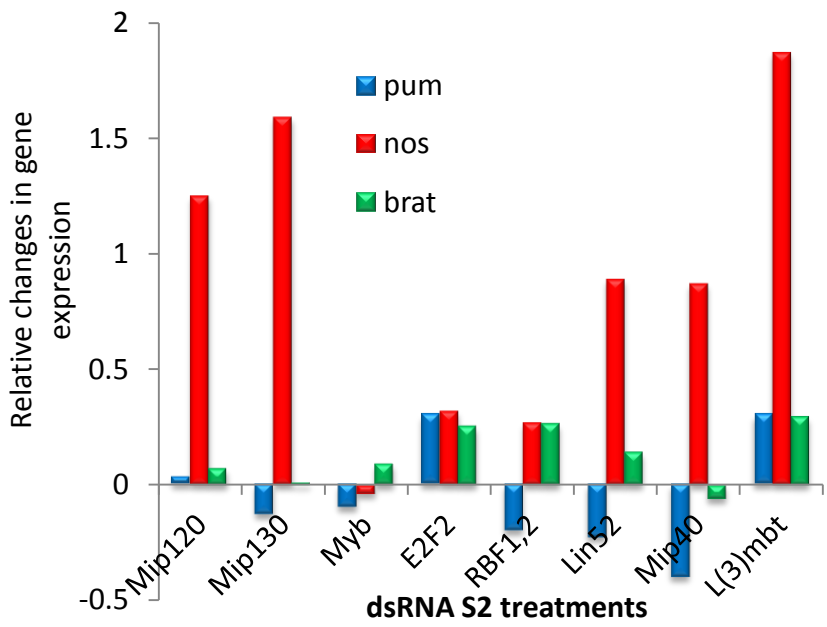

**D**

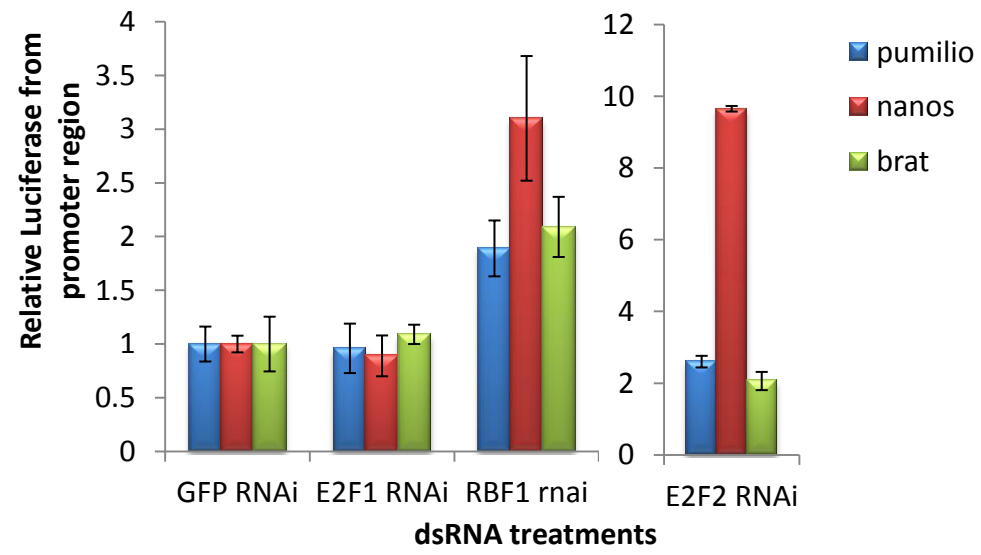

Miles\_Supplementary Figure S3: The human pocket proteins regulate the expression of the mammalian PUM complex

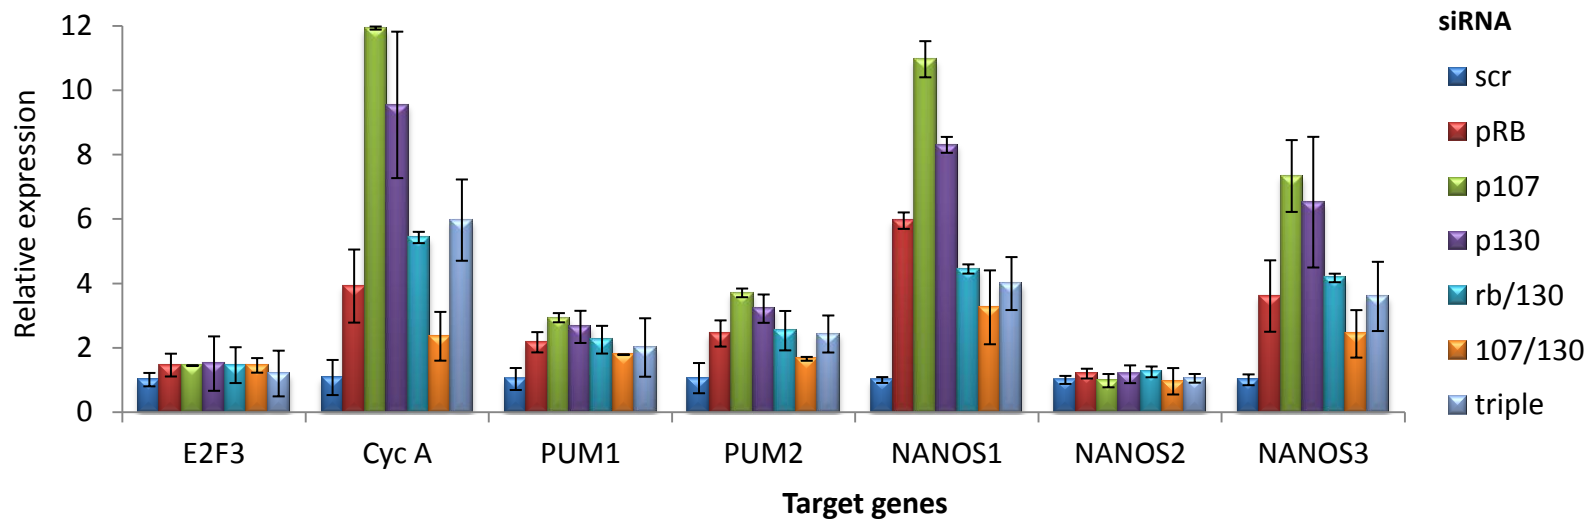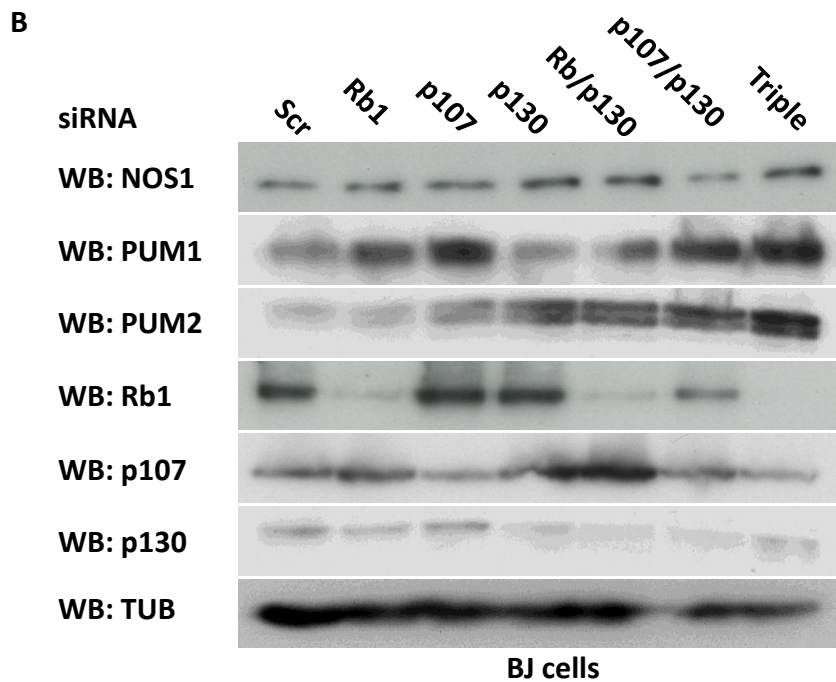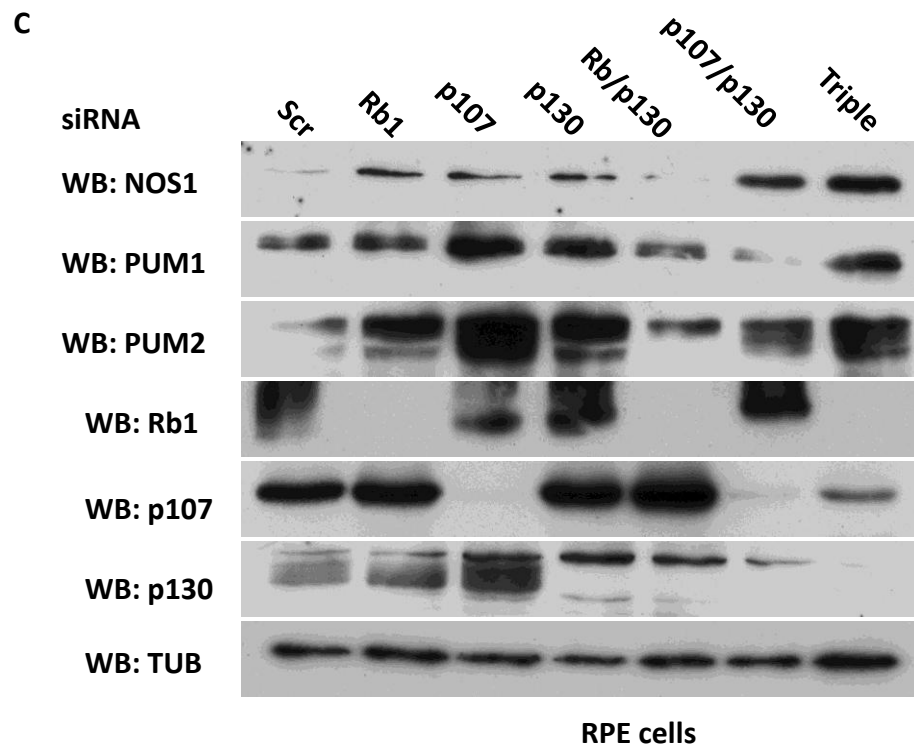

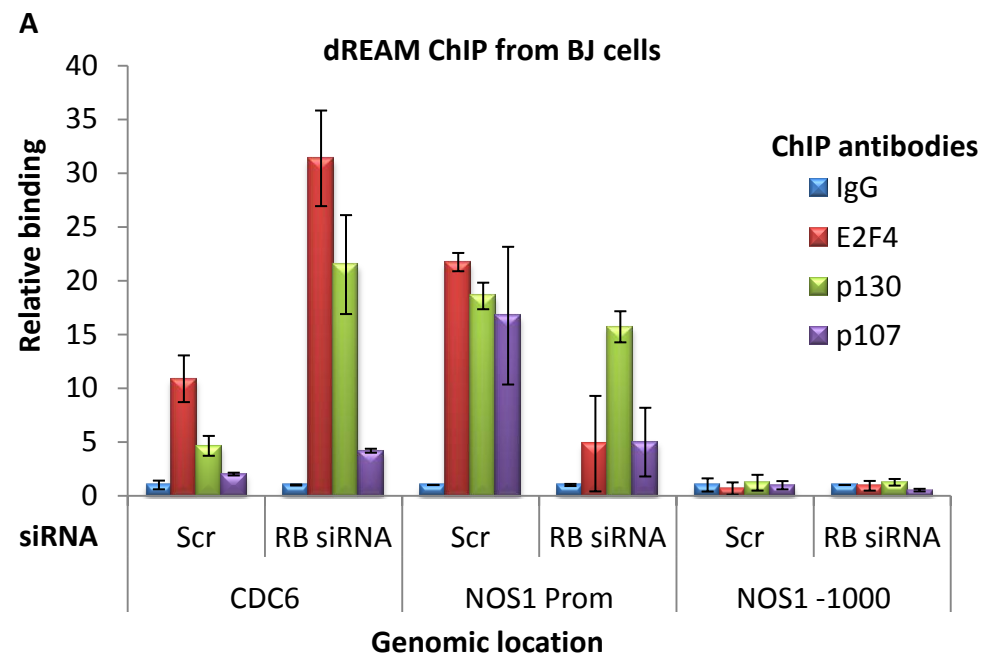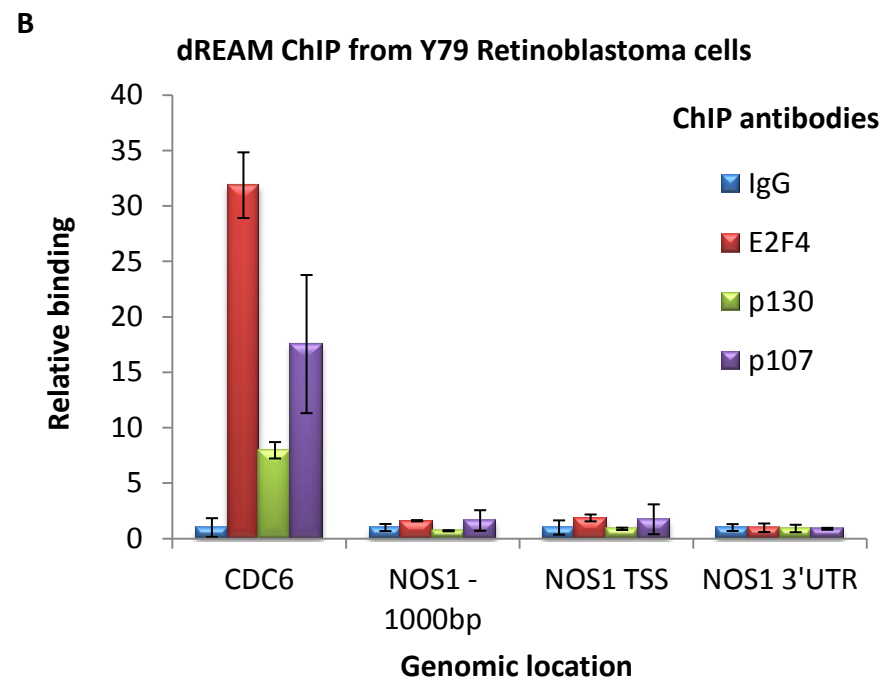

Supplementary Figure S4: Rb1 loss diminishes pocket protein binding to the NANOS1 promoter



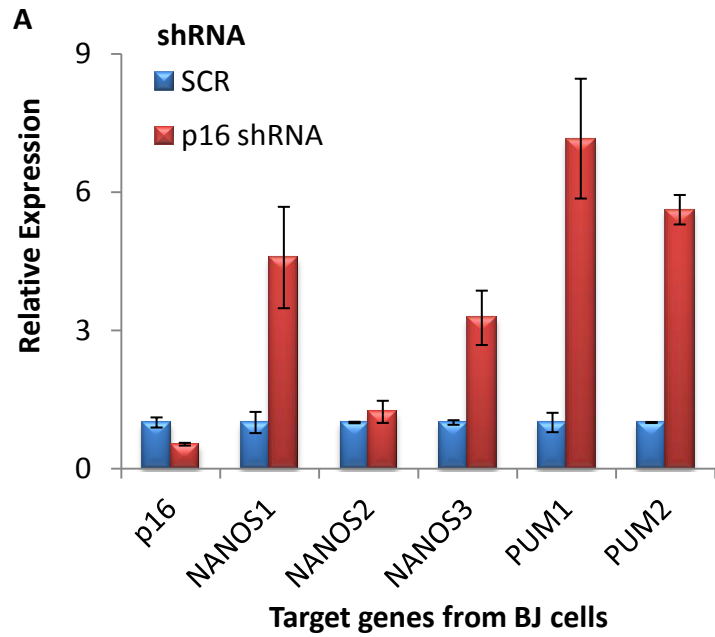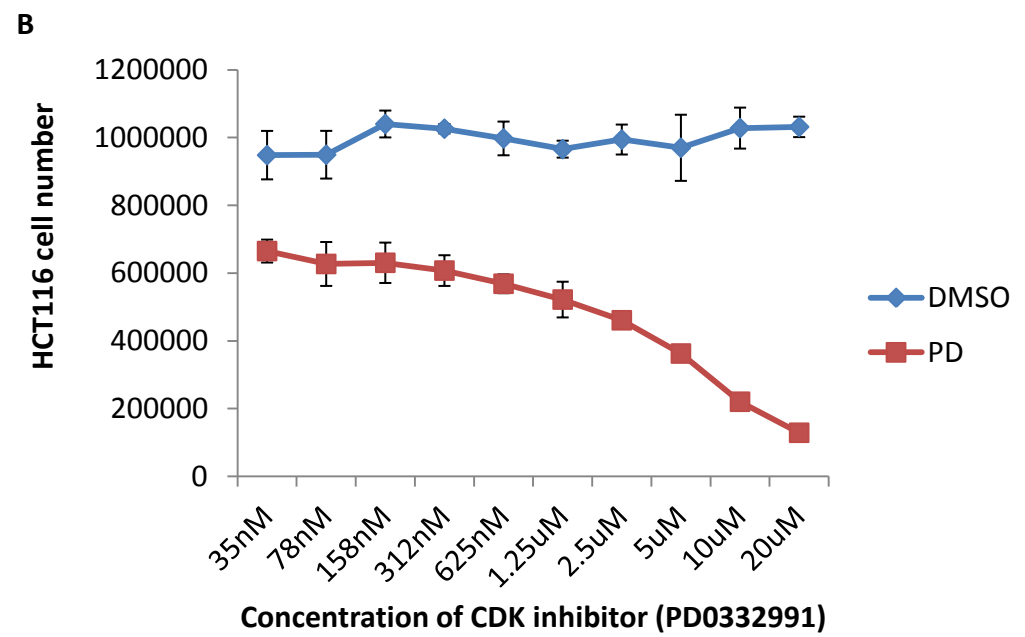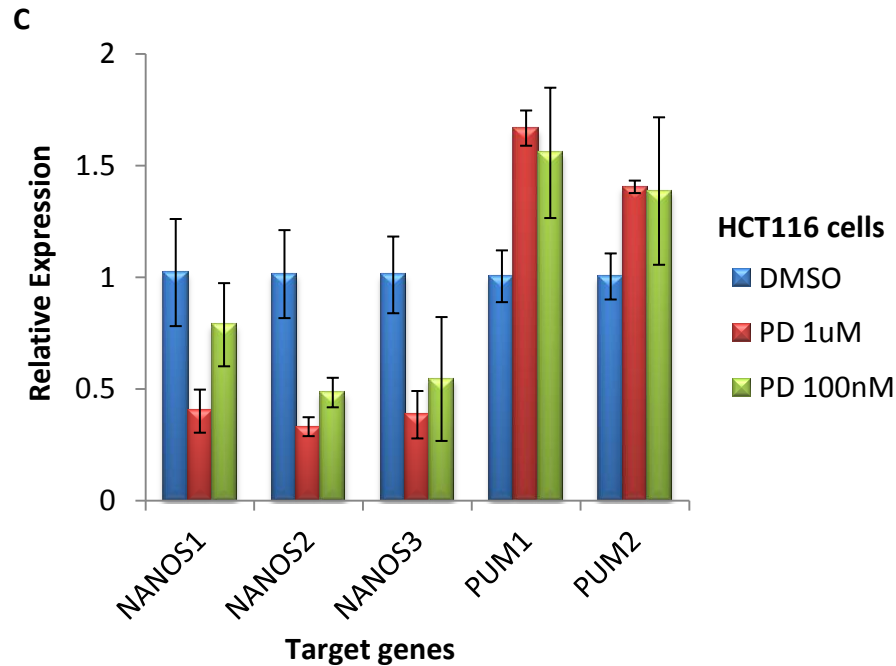

Miles Supplementary Figure S5: p16 and CDK inhibitors effect NANOS

suppression

**A PUM complex correlation with Rb1 expression**

| Rb1 | tested gene | Correlation with Rb1 expression | p value  |
|-----|-------------|---------------------------------|----------|
| Rb1 | PUM1        | -0.04695035                     | 0.155435 |
| Rb1 | PUM2        | 0.2316398                       | 1.23E-12 |
| Rb1 | NANOS1      | -0.2422241                      | 1.04E-13 |
| Rb1 | NANOS2      | 0.01336904                      | 0.685987 |
| Rb1 | NANOS3      | -0.1438667                      | 1.22E-05 |

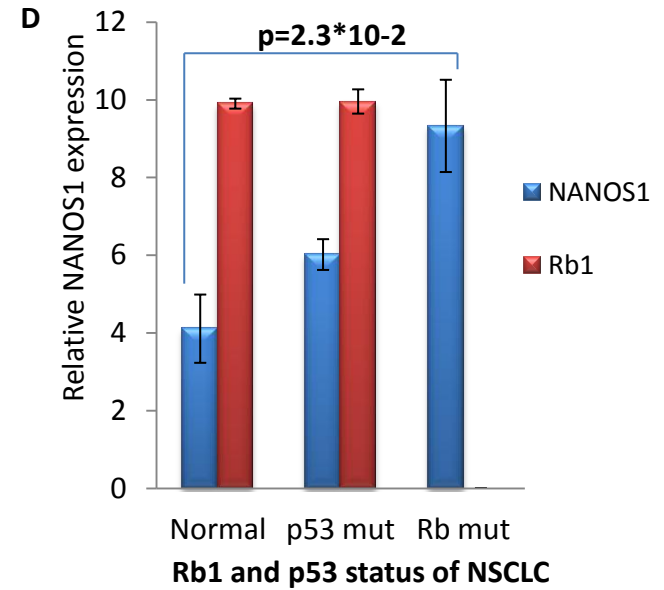

**B PUM complex correlation with Rb1, Rbl1 and Rbl2 expression**

| Pum    | RB1: corr | RB1: P   | RBL1: corr | RBL1: P  | RBL2: corr | RBL2: P  |
|--------|-----------|----------|------------|----------|------------|----------|
| NANOS1 | -0.242    | 1.04e-13 | -0.114     | 0.000543 | -0.123     | 0.000182 |
| NANOS2 | 0.013     | 0.686    | 0.127      | 0.000115 | 0.042      | 0.205    |
| NANOS3 | -0.144    | 1.22e-05 | -0.092     | 0.00517  | -0.074     | 0.0248   |
| PUM1   | -0.047    | 0.155    | -0.098     | 0.00302  | 0.139      | 2.42e-05 |
| PUM2   | 0.232     | 1.23e-12 | 0.226      | 4.14e-12 | 0.242      | 1.19e-13 |

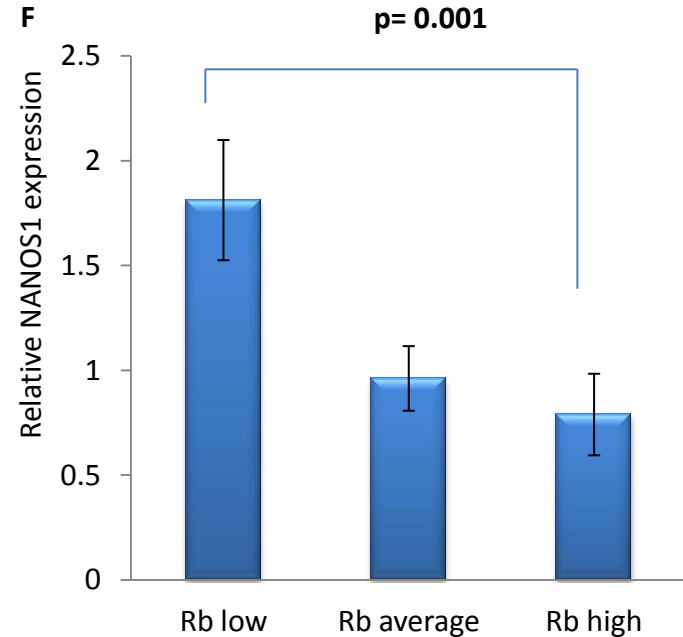

**C PUM complex correlation with Rb1 loss signature**

| tested gene | median corr. signature | median corr. other genes | p value  |
|-------------|------------------------|--------------------------|----------|
| PUM1        | 0.039                  | 0.001                    | 5.98E-05 |
| PUM2        | 0.17                   | 0.029                    | 5.28E-09 |
| NANOS1      | 0.022                  | -0.013                   | 0.00026  |
| NANOS2      | 0.037                  | 0.033                    | 0.394    |
| NANOS3      | -0.026                 | 0.013                    | 8.64E-11 |

**E**

|  | normal       | p53 mut   | p16/p53 mut |
|--|--------------|-----------|-------------|
|  | NCI-H358     | NCI-H1573 | NCI-H1793   |
|  | IMR-90       | NCI-H1703 | NCI-H596    |
|  | COR-L 105    |           | NCI-H1734   |
|  | WI 38        |           | NCI-H2228   |
|  | Hs 894(E).Lu |           | NCI-H1563   |
|  | Hs 417.Lu    |           | NCI-H1693   |

Miles\_Supplementary Figure S7: Heat map of the correlation between PUM/NANOS with the Rb1 loss signature

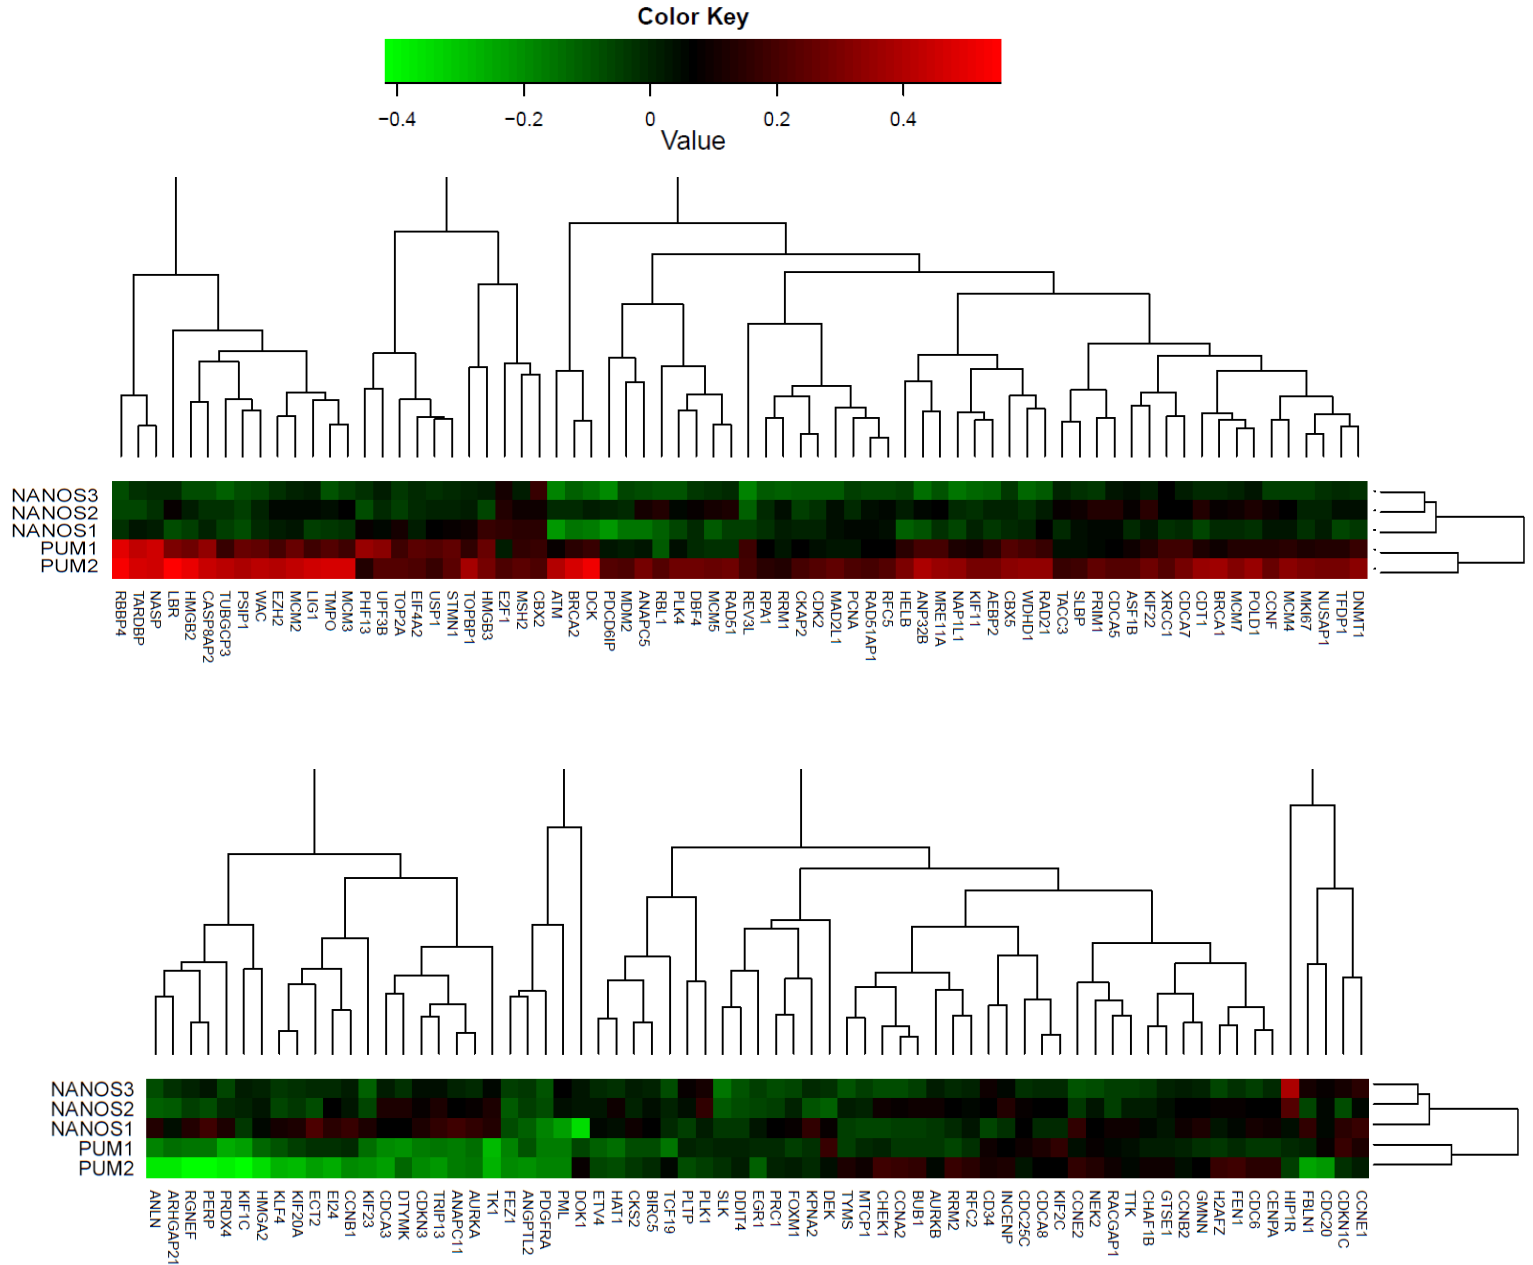

**A** Miles\_Supplementary Figure S8: Genetic interaction between Pum complex components and RBF1 and E2F2

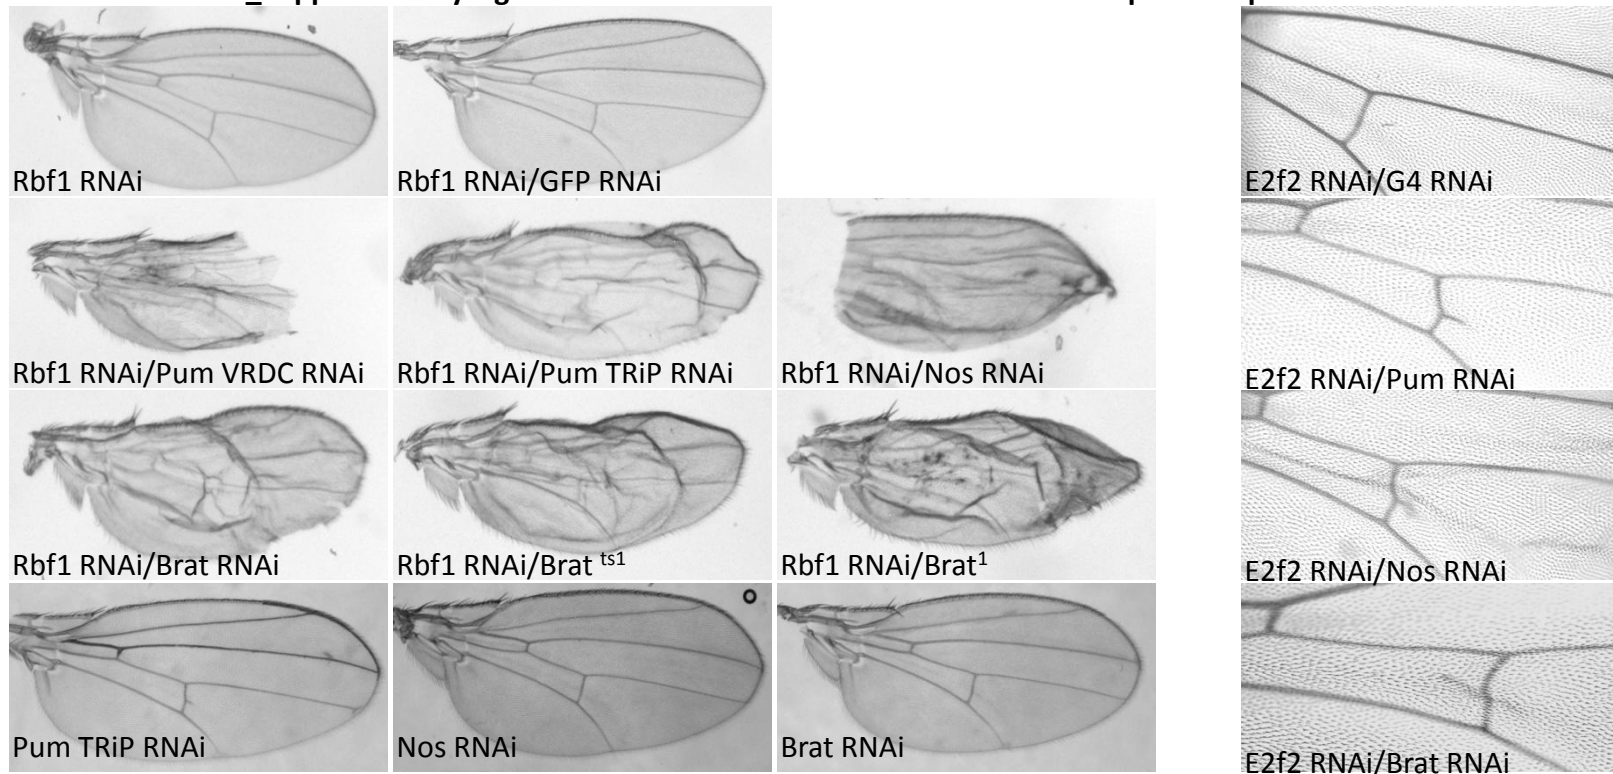

**Nub-Gal4 crosses**

**En-Gal4 crosses**

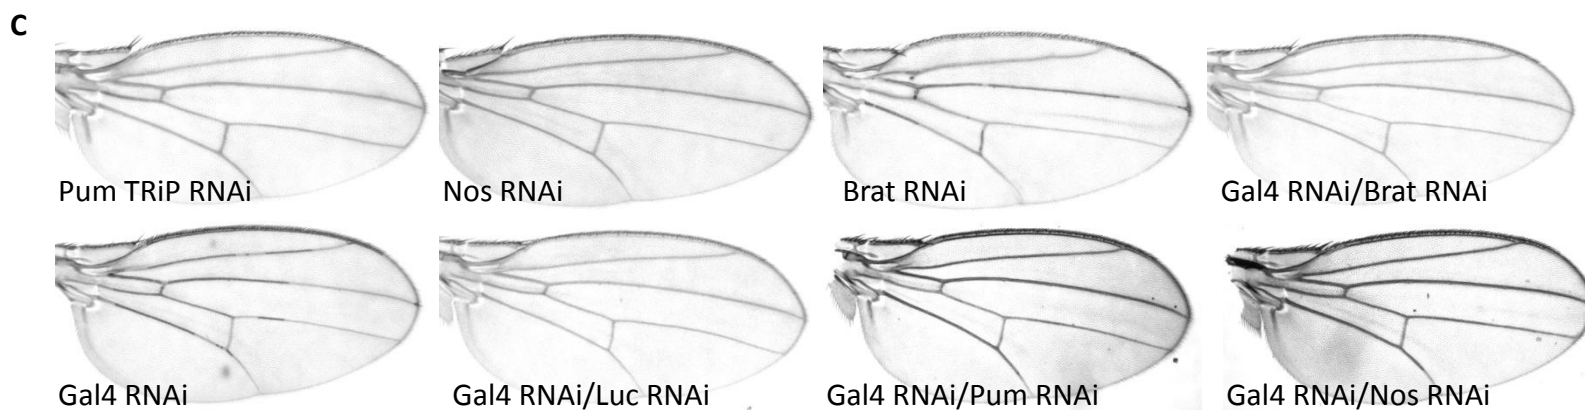

**UAS-DICER; Nub-Gal4 crosses**

Miles\_Supplementary Figure S9: Rb1 and Nanos1 depletion reduces murine cell number

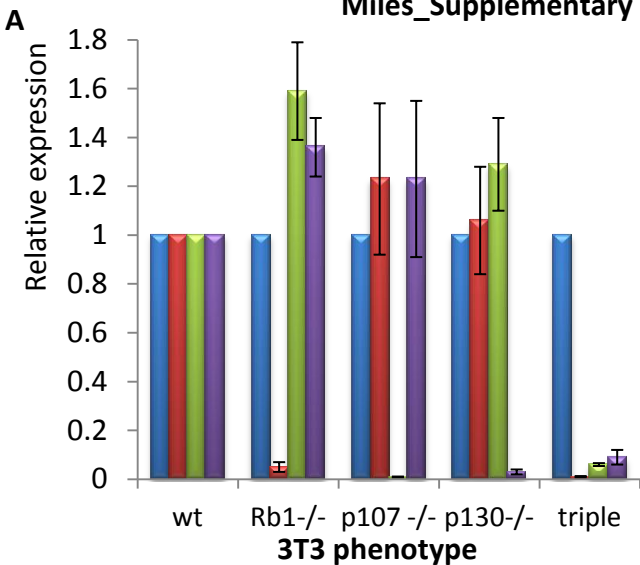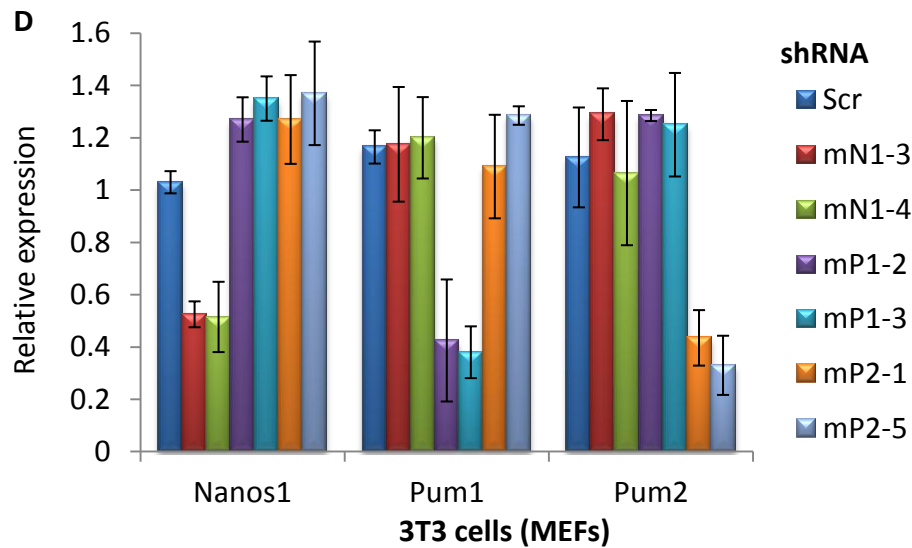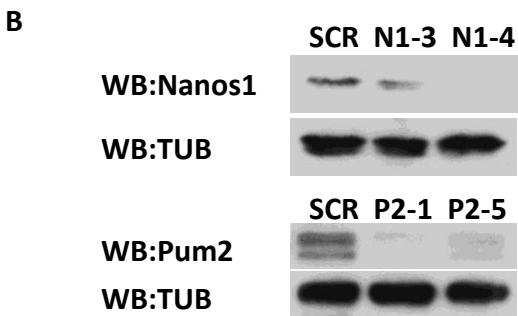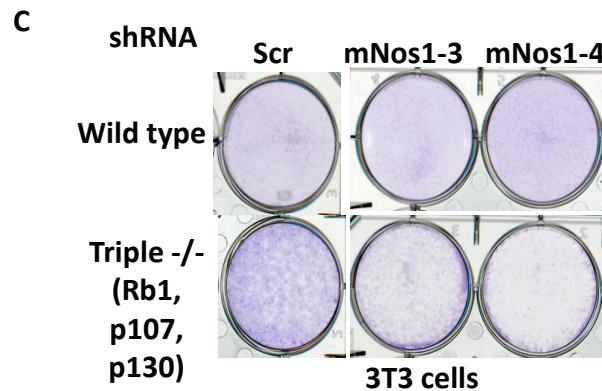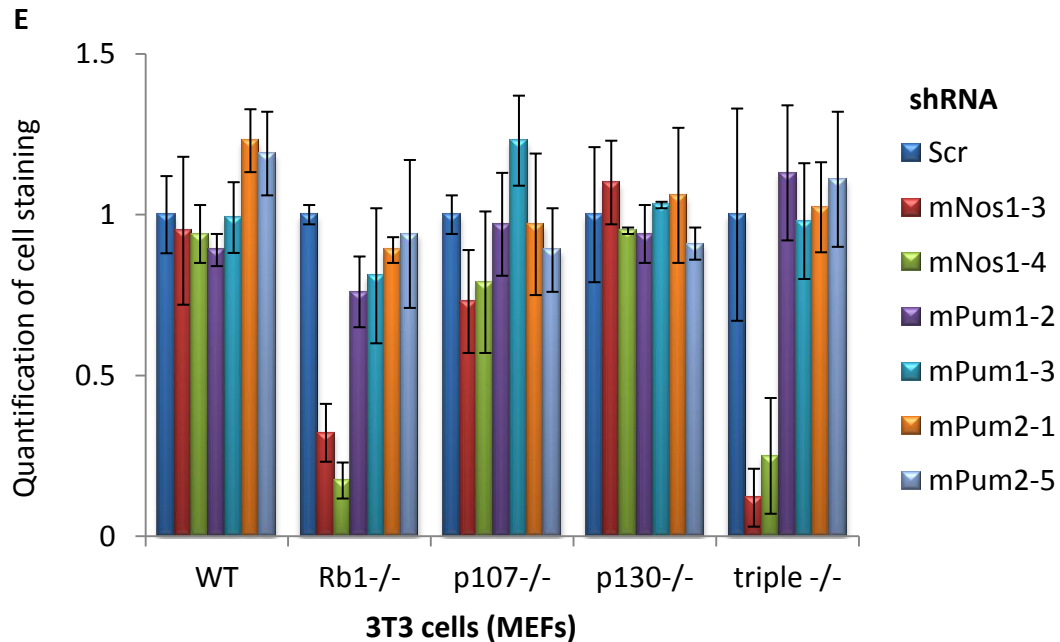

Miles Supplementary Figure S10: Depletion of NANOS1 and pRb reduces human cell number

A

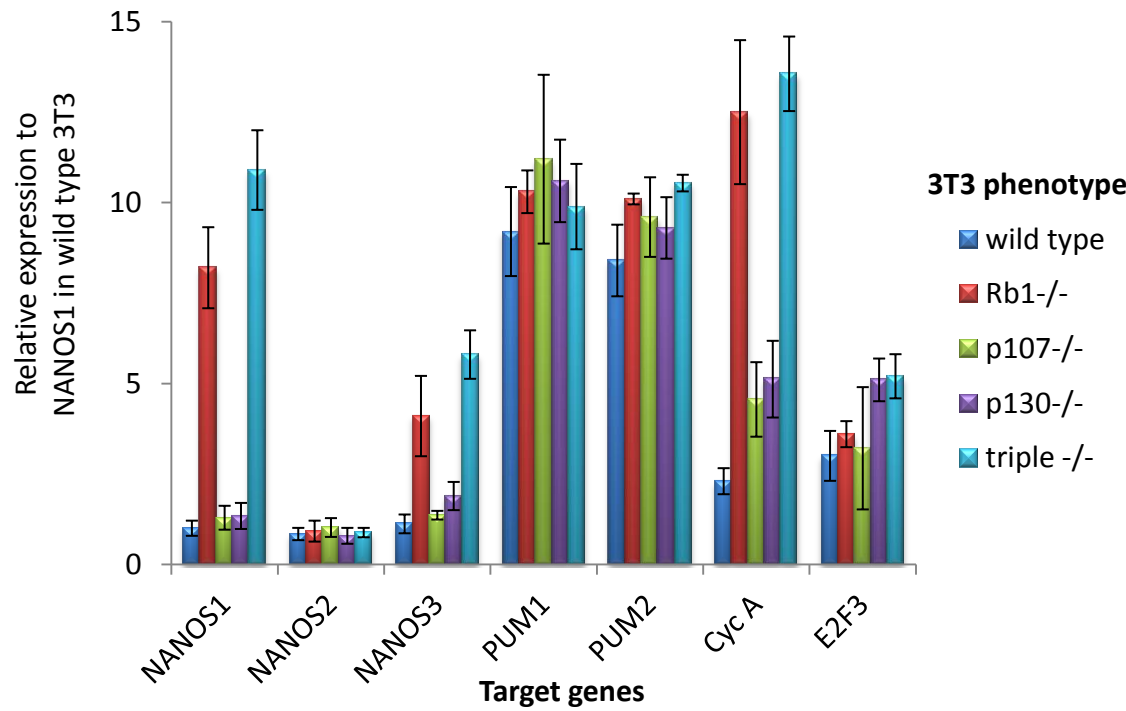

C

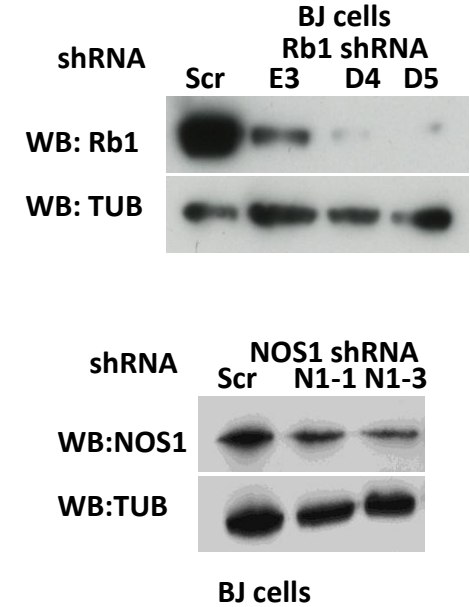

B

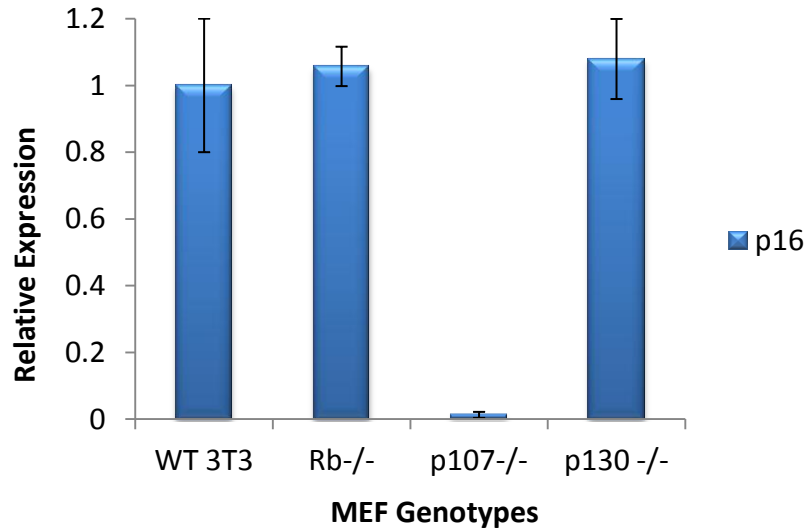

D

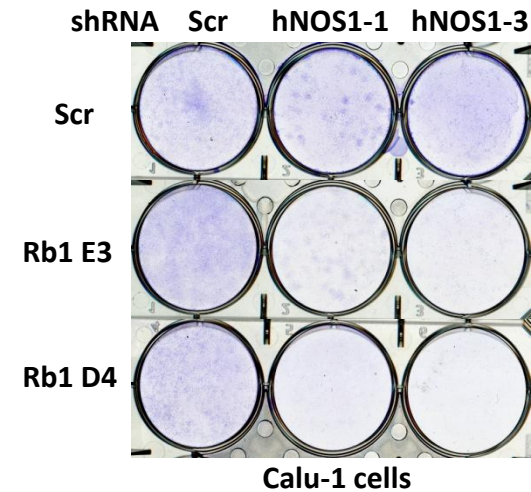

Miles\_Supplementary Figure S11: Functional p53 is necessary for Rb1 and NANOS1 silencing to affect cancer cell number

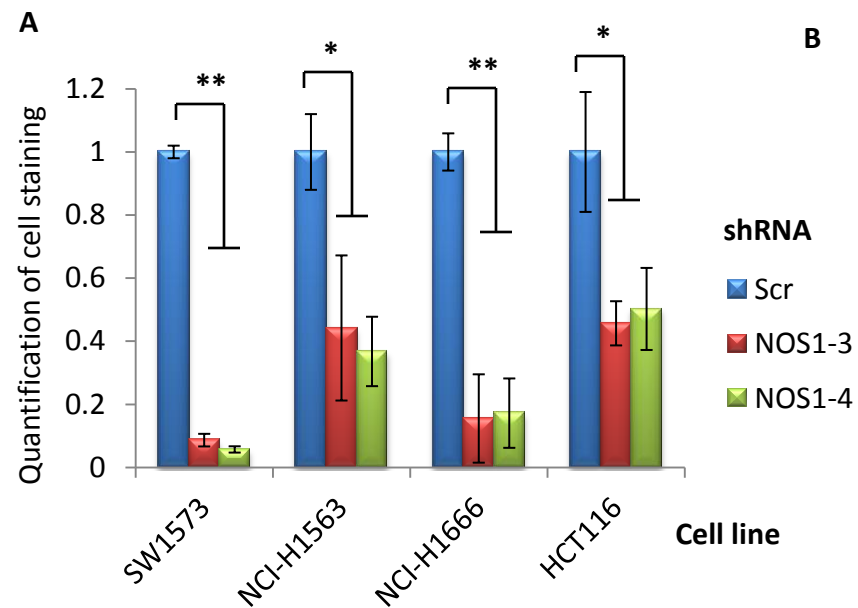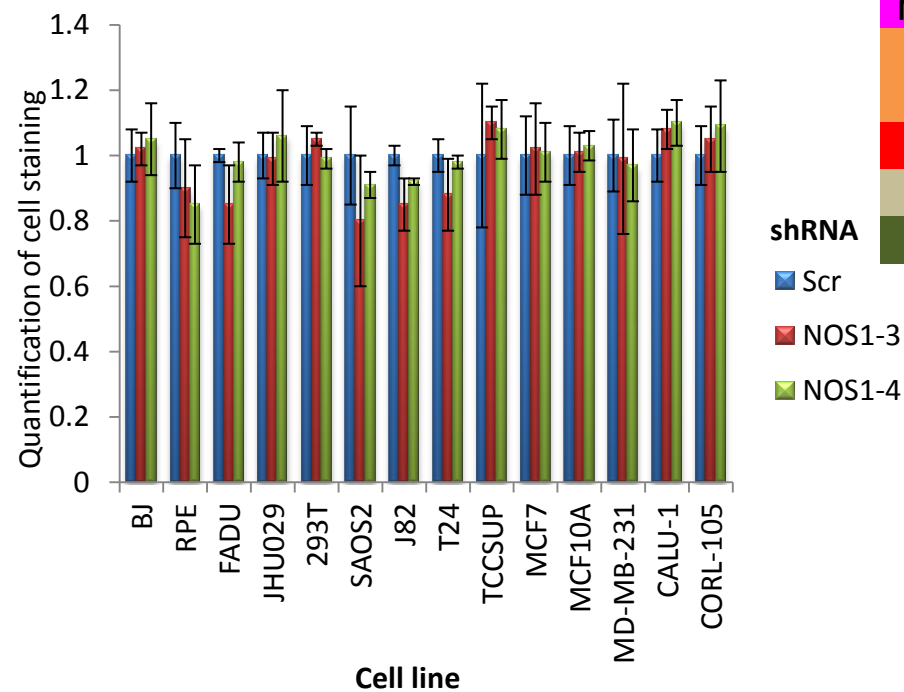

**B**

| Cell lines | Rb1/p16 status | TP53 status | synthetic lethal nanos1 |
|------------|----------------|-------------|-------------------------|
| BJ         | wt             | wt          | no                      |
| RPE        | wt             | wt          | no                      |
| Calu-1     | wt             | wt          | no                      |
| Corl-105   | wt             | wt          | no                      |
| SW1573     | mut            | wt          | yes                     |
| NCI-H1563  | mut            | wt          | yes                     |
| NCI-H1666  | mut            | wt          | yes                     |
| T24        | wt             | mut         | no                      |
| J82        | mut            | mut         | no                      |
| TCCSUP     | mut            | mut         | no                      |
| MCF10a     | wt             | wt          | no                      |
| MCF7       | mut            | wt          | no                      |
| MDA-MB-231 | mut            | mut         | no                      |
| FADU       | wt             | mut         | no                      |
| JHU029     | mut            | mut         | no                      |
| 293T       | mut            | mut         | no                      |
| HCT-116    | mut            | wt          | yes                     |
| Saos2      | mut            | mut         | no                      |

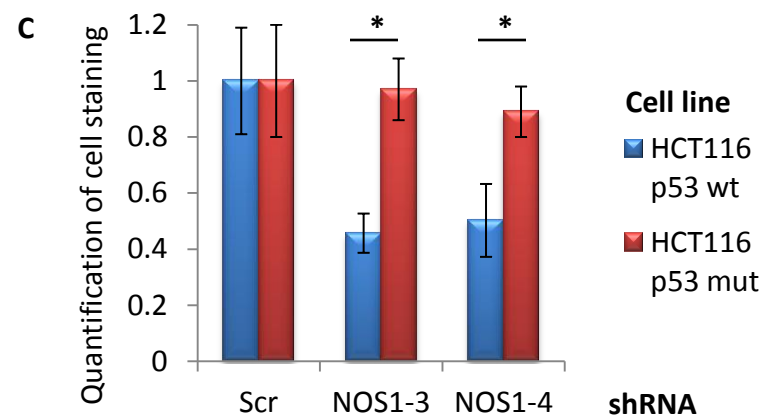

**A**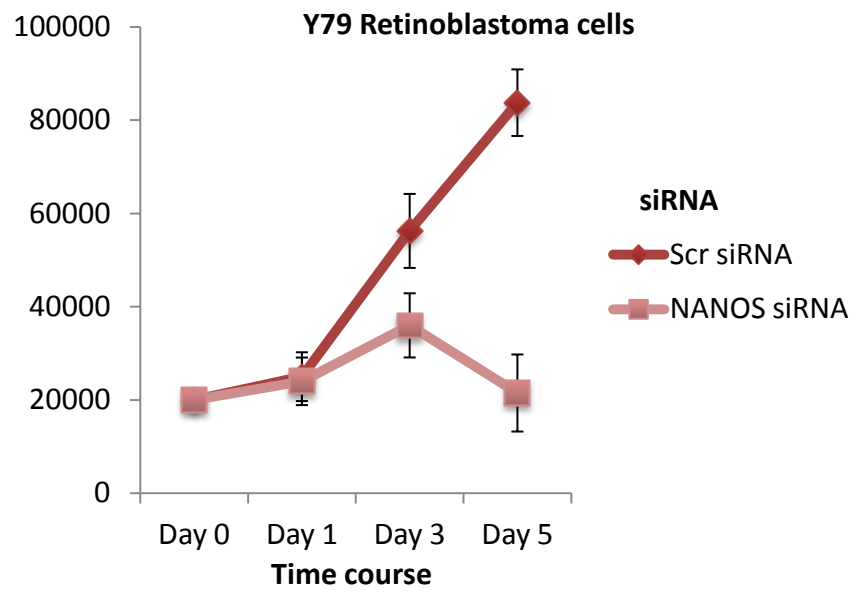**B**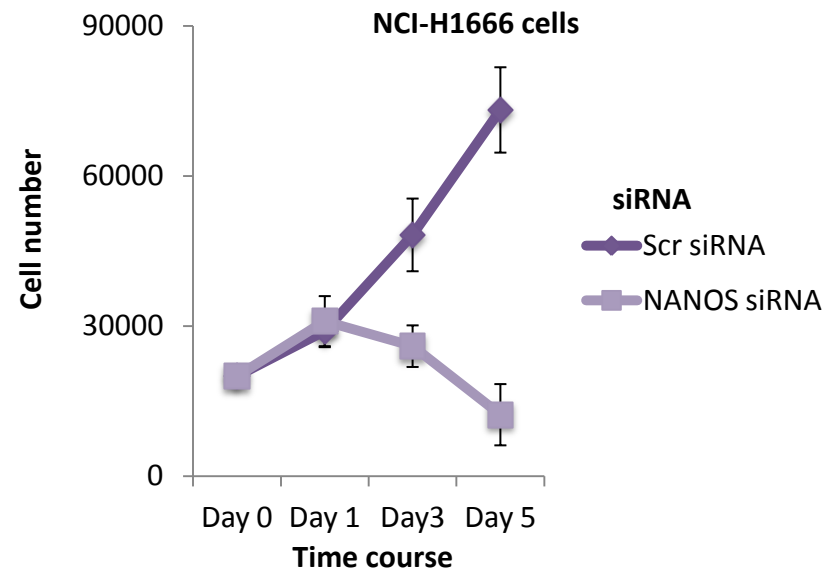**C**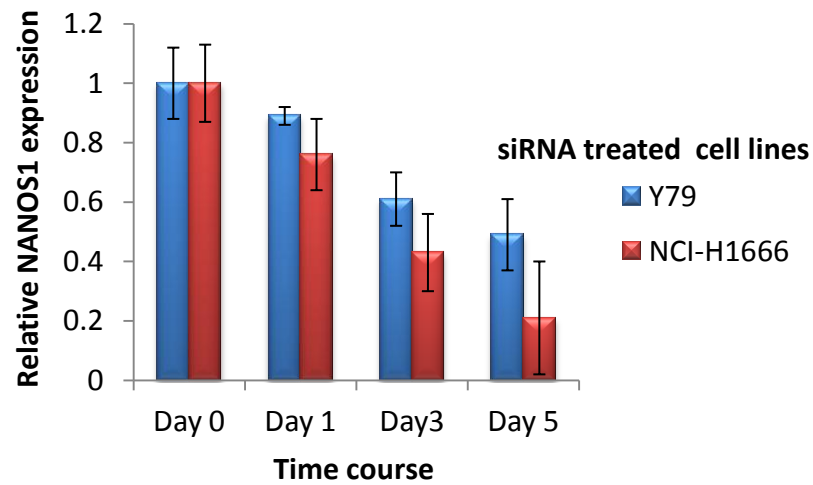

Miles Supplementary Figure S12: NANOS1 depletion reduces cell number in pRb-deficient cancer cells



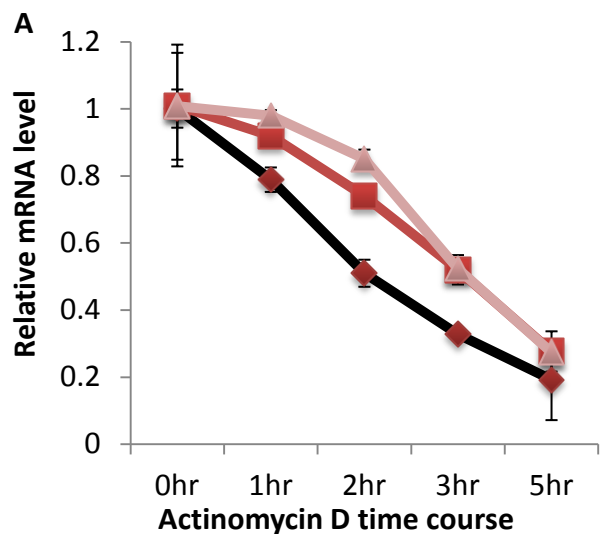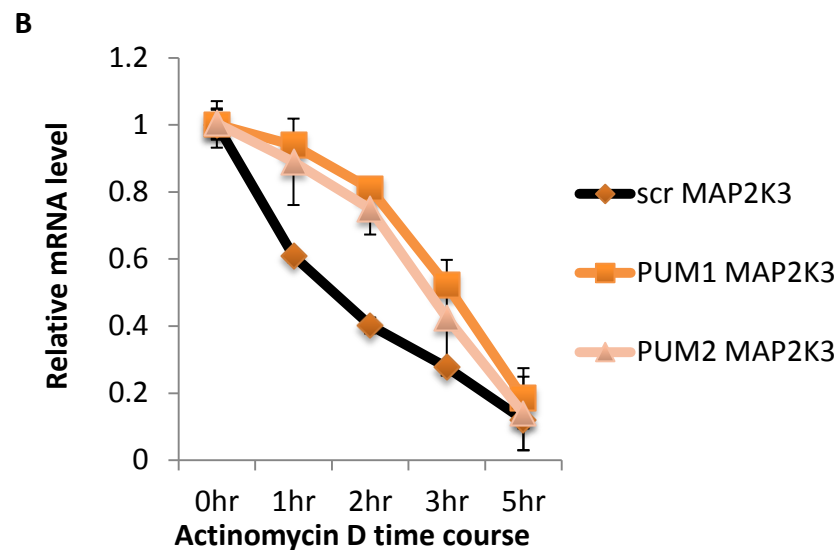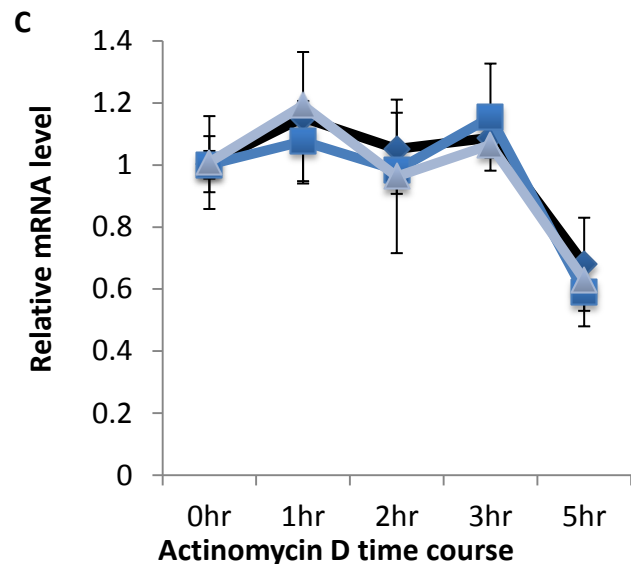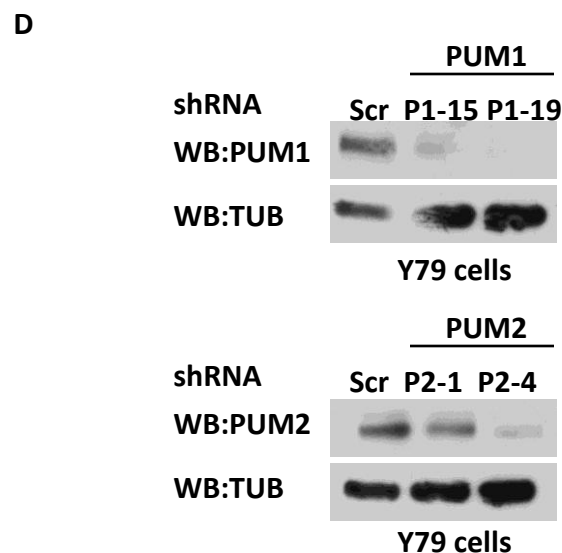

Miles Supplementary Figure S13: Loss of PUM activity stabilizes transcripts down-regulated in Retinoblastoma tumors

A

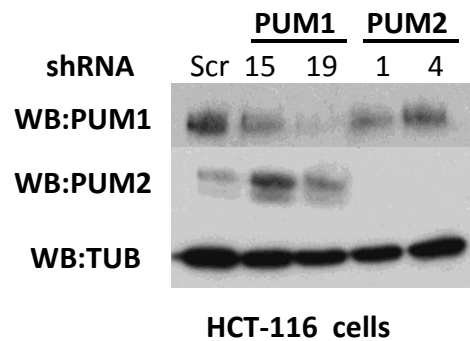

C

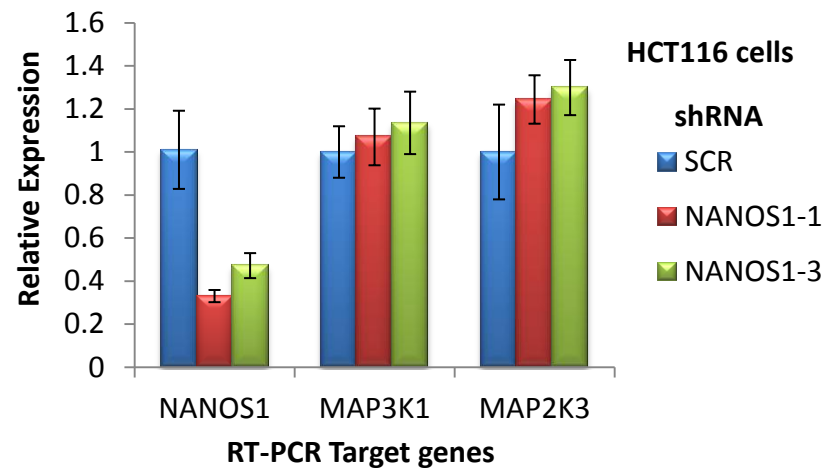

B

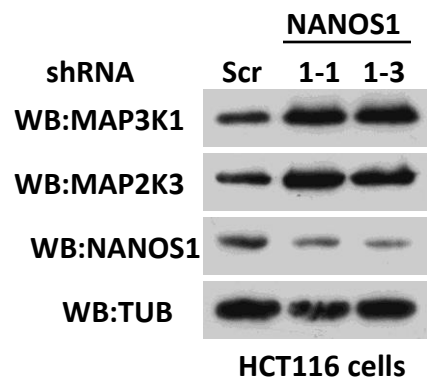

D

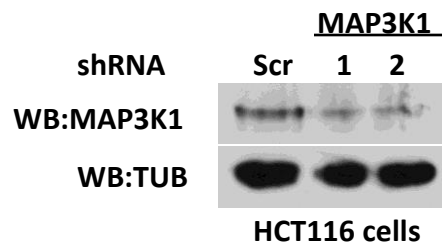

E

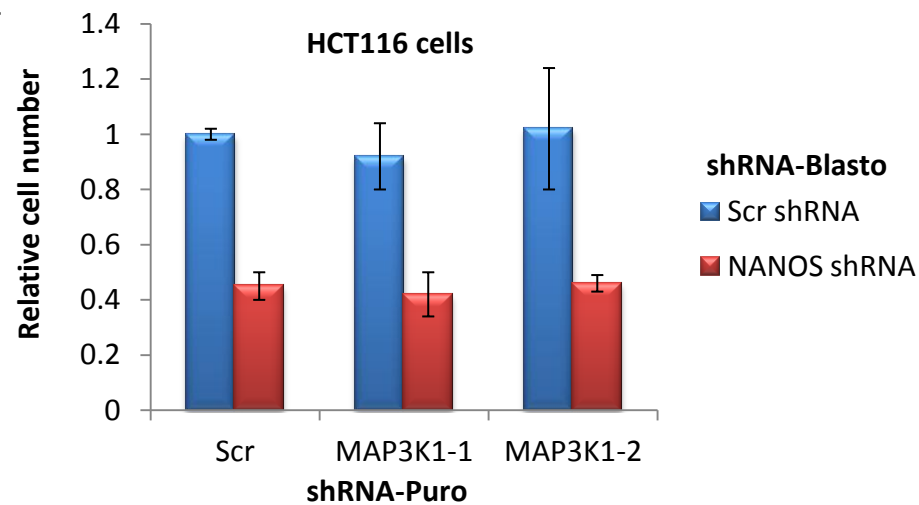

Miles\_Supplementary Table S1: Genetic interaction between the Pumilio complex and rbf1

|                            | Nub-Gal4;rbf1-RNAi |                               | <i>rbf1</i> <sup>120a</sup> |            | <i>rbf1</i> <sup>120a</sup> /Y;GMR-Gal4/CyO |
|----------------------------|--------------------|-------------------------------|-----------------------------|------------|---------------------------------------------|
| <i>w</i> <sup>1118</sup>   | -                  | <i>w</i> <sup>1118</sup>      | -                           | Gal4-RNAi  | -                                           |
| Gal4-RNAi                  | -                  | <i>pum</i> <sup>13</sup>      | +                           | pum RNAi   | +                                           |
| GFP-RNAi                   | -                  | <i>pum</i> <sup>p100c10</sup> | +                           | nanos RNAi | +                                           |
| white-RNAi                 | -                  | <i>pum</i> <sup>3</sup>       | -                           | brat RNAi  | +                                           |
| pum-RNAi (VDRC)            | +++                | <i>pum</i> <sup>msc</sup>     | -                           |            |                                             |
| pum-RNAi (TRiP)            | +++                | <i>nos</i> <sup>L7</sup>      | +                           |            | En-Gal4;e2f2 RNAi                           |
| <i>pum</i> <sup>13</sup>   | +                  | <i>nos</i> <sup>J3B6</sup>    | +                           | Gal4-RNAi  | -                                           |
| nanos-RNAi                 | +++                | <i>brat</i> <sup>6028</sup>   | +                           | pum-RNAi   | +                                           |
| <i>nos</i> <sup>L7</sup>   | +                  | <i>brat</i> <sup>1</sup>      | +                           | nanos-RNAi | +                                           |
| <i>nos</i> <sup>J3B6</sup> | +                  | <i>brat</i> <sup>ts1</sup>    | +                           | brat-RNAi  | +                                           |
| brat-RNAi                  | +++                |                               |                             |            |                                             |
| <i>brat</i> <sup>ts1</sup> | ++                 |                               |                             |            |                                             |
| <i>brat</i> <sup>1</sup>   | ++                 |                               |                             |            |                                             |

|                     | e2f2 RNAi (03344) | <i>e2f2</i> <sup>76Q.1</sup> | <i>dp</i> <sup>a3</sup> |
|---------------------|-------------------|------------------------------|-------------------------|
| Nub-Gal4;Gal4-RNAi  | -                 | -                            | -                       |
| Nub-Gal4;pum-RNAi   | +                 | -                            | +                       |
| Nub-Gal4;nanos-RNAi | +                 | +                            | +                       |
| Nub-Gal4;brat-RNAi  | +                 | +                            | +                       |
