# Supplementary material
Source: PubMed Central journal article supplement (PMC4282507)

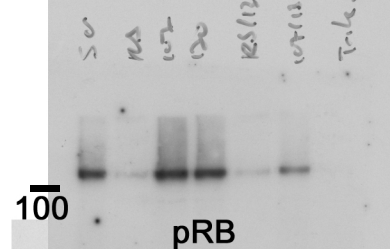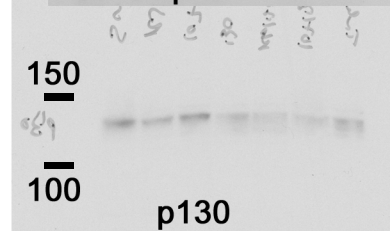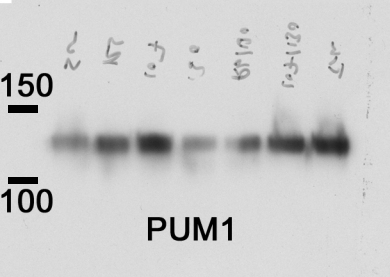

Miles Supp  
Fig 3B

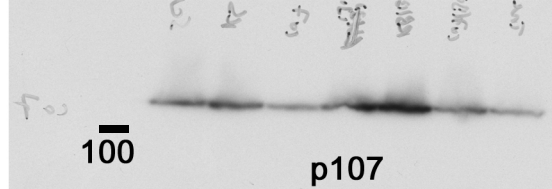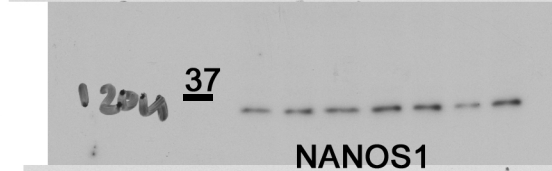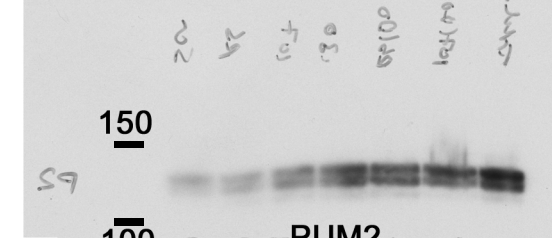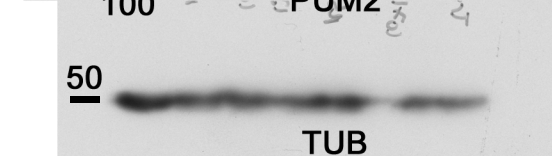

Supplement: embj0033-2201-sd2.pdf [file embj0033-2201-sd2.pdf]

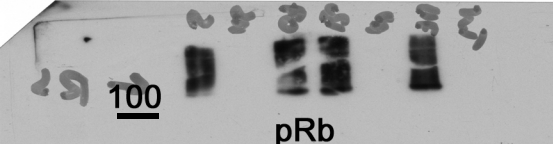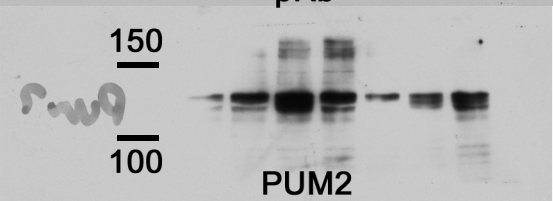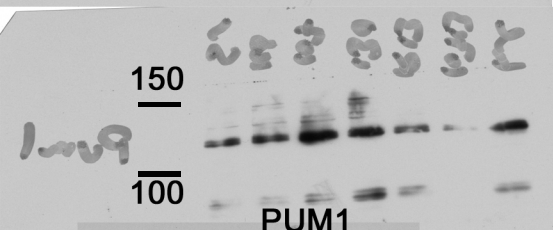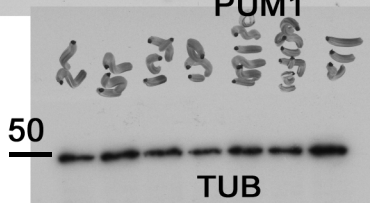

Miles Supp  
Fig 3C

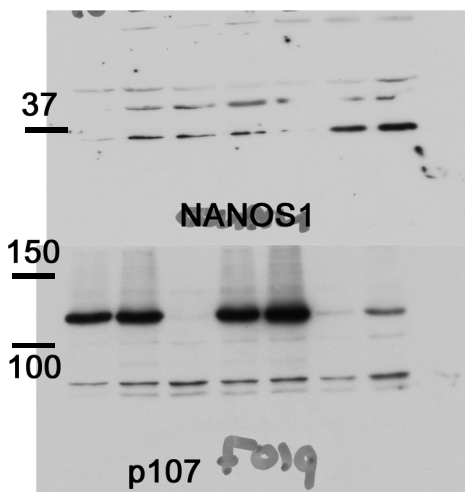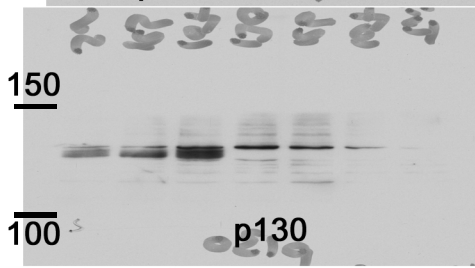

Supplement: embj0033-2201-sd3.pdf [file embj0033-2201-sd3.pdf]

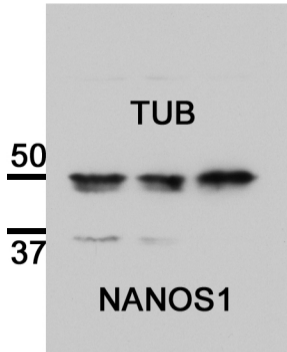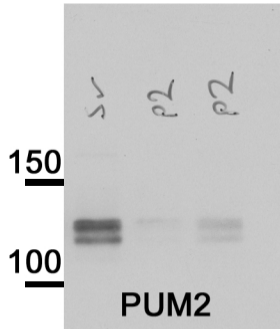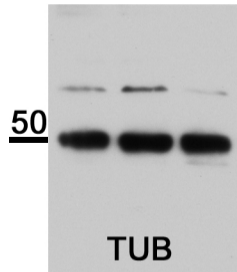

MILES SUPP FIG 9

Supplement: embj0033-2201-sd4.pdf [file embj0033-2201-sd4.pdf]

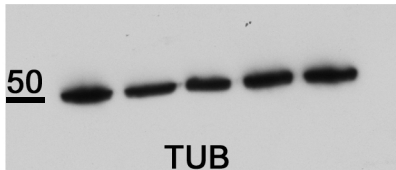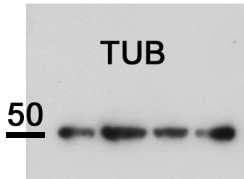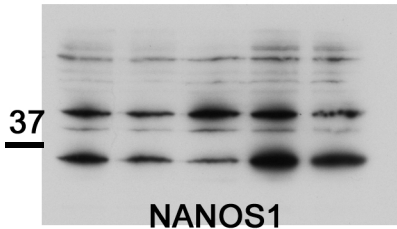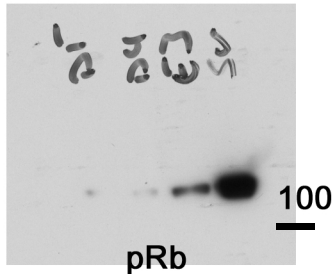

MILES SUPP FIG 10

Supplement: embj0033-2201-sd5.pdf [file embj0033-2201-sd5.pdf]

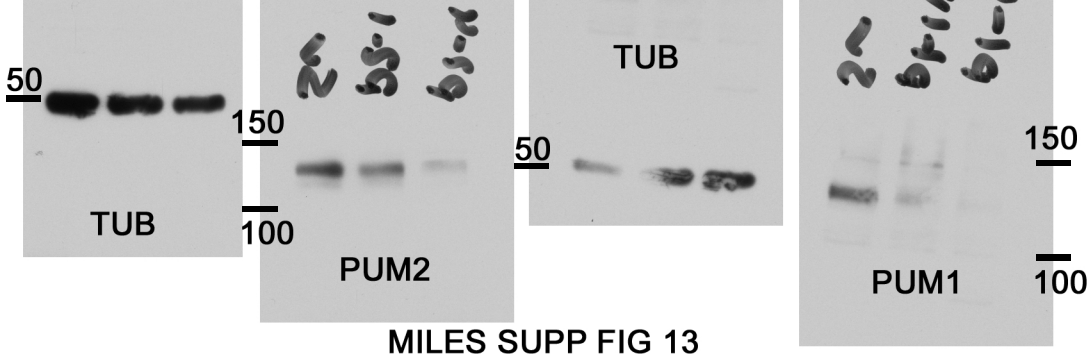

Supplement: embj0033-2201-sd6.pdf [file embj0033-2201-sd6.pdf]

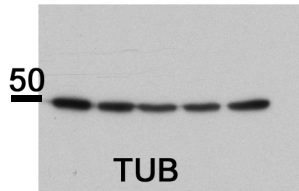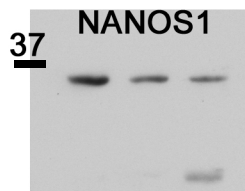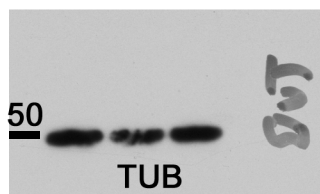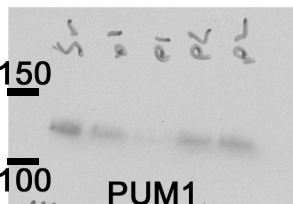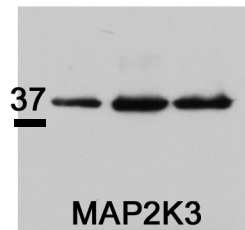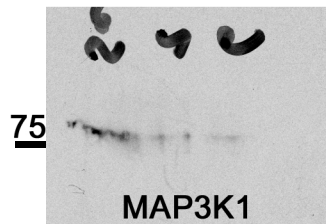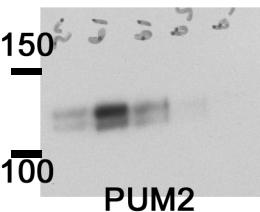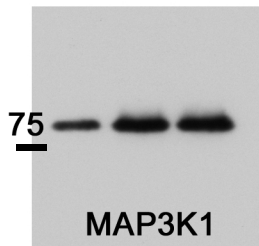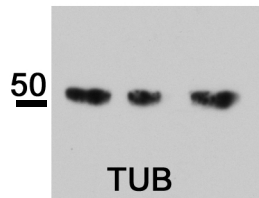

MILES SUPP FIG 14

Supplement: embj0033-2201-sd7.pdf [file embj0033-2201-sd7.pdf]

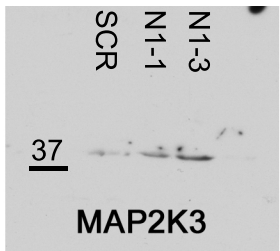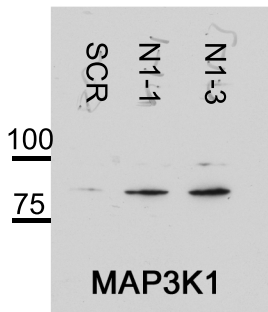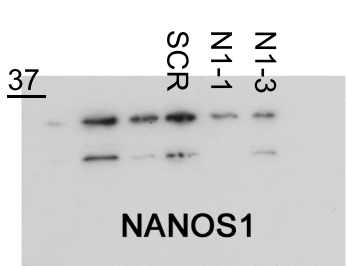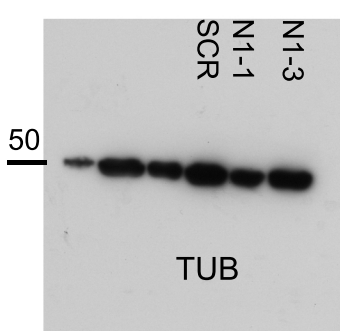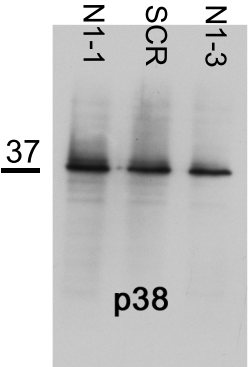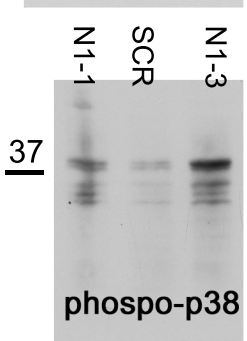

**MILES FIGURE 6 SCANS**

Supplement: embj0033-2201-sd9.pdf [file embj0033-2201-sd9.pdf]
